# Supplementary material
Source: publisher figshare collection journal article supplement (https://aacr.figshare.com/articles/dataset/_/22758810)
Supplement: Supplementary file 1 [file 40438194]

1 **Supplemental Table 1: Summary of clinical features of primary B-ALL specimens**

| <b>Sample</b> | <b>Sex</b> | <b>Age</b> | <b>Type</b> | <b>Cytogenetics</b>        | <b>Somatic Mutation</b>   |
|---------------|------------|------------|-------------|----------------------------|---------------------------|
| SU215         | Female     | 28         | Ph+ B-ALL   | t(9;22)(q34;q11.2)/Complex | IKZF1,PAX5,<br>TCF3, EBF1 |
| SU453         | Female     | 47         | Ph+ B-ALL   | t(9;22)(q34;q11.2)         | None detected             |
| SU536         | Male       | 66         | Ph+ B-ALL   | t(9;22)                    | None detected             |
| SU893         | Female     | 76         | Ph+ B-ALL   | t(9;22)(q34;q11.2)         | Not done                  |

2
